# Supplementary material
Source: bioRxiv or medRxiv preprint supplement (https://www.biorxiv.org/highwire/filestream/58299/field_highwire_adjunct_files/0/192005-1.pdf)
Supplement: Supplementary file [file 192005-1.pdf]

# gene2drug: a Computational Tool for Pathway-based Rational Drug Repositioning

## Supplementary Information

Francesco Napolitano<sup>1</sup>, Diego Carrella<sup>1</sup>, Barbara Mandriani<sup>1</sup>, Sandra Pisonero<sup>1</sup>, Diego Medina<sup>1</sup>, Nicola Brunetti-Pierri<sup>1,2</sup>, and Diego di Bernardo<sup>1,3</sup>

<sup>1</sup>*Telethon Institute of Genetics and Medicine (TIGEM), Pozzuoli (NA), 80078, Italy.*

<sup>2</sup>*Department of Translational Medicine, Federico II University, 80131 Naples, Italy*

<sup>3</sup>*Department of Chemical, Materials and Industrial Production Engineering, University of Naples Federico II, 80125 Naples, Italy.*

### List of Figures

|    |                                                                                                                                                                                                                                                                                                                                                                                                                                                                                                                                                                                                                                                     |   |
|----|-----------------------------------------------------------------------------------------------------------------------------------------------------------------------------------------------------------------------------------------------------------------------------------------------------------------------------------------------------------------------------------------------------------------------------------------------------------------------------------------------------------------------------------------------------------------------------------------------------------------------------------------------------|---|
| S1 | Relation between PPI network-based and pathway based approaches. Given a therapeutic gene and the set of pathways it is annotated to according to the different databases, the other genes in the same pathways are topologically closer to it in the PPI network as compared to randomly chosen genes. The average shortest path from the selected gene to other pathway members is reported on the $y$ axis for each database. . . . .                                                                                                                                                                                                            | 3 |
| S2 | Size of intersection between existent evidence scores in the STITCH database (subset matched against the Cmap database) as a percentage of the total number of evidences. Numbers on the diagonal represent how many times a drug-target evidence exists divided by the total number of reported pairs. A “combined score” always exist if one of the other evidences exist, thus “combined score” covers 100% of the pairs. Conversely, an “experimental” score is only present for 14% of the pairs. The “Text mining” evidence strongly drives the “combined score” covering 61% of all the known protein-target interactions in STITCH. . . . . | 4 |
| S3 | Relative luminescence units (RLU) in Hepa1-6 cells transfected with a plasmid expressing the luciferase gene under the control of the GPT promoter and incubated with various concentrations of fulvestrant. . . . .                                                                                                                                                                                                                                                                                                                                                                                                                                | 5 |
| S4 | Relative luminescence units (RLU) in Huh7 cells transfected with a plasmid expressing the luciferase gene under the control of the GPT promoter and incubated with various concentrations of fulvestrant. . . . .                                                                                                                                                                                                                                                                                                                                                                                                                                   | 5 |
| S5 | Relative luminescence units (RLU) in Hepa1-6 cells transfected with a plasmid expressing the luciferase gene under the control of the GPT promoter and incubated with various concentrations of tomatidine. . . . .                                                                                                                                                                                                                                                                                                                                                                                                                                 | 6 |
| S6 | Relative luminescence units (RLU) in Huh7 cells transfected with a plasmid expressing the luciferase gene under the control of the GPT promoter and incubated with various concentrations of tomatidine. . . . .                                                                                                                                                                                                                                                                                                                                                                                                                                    | 6 |
| S7 | Relative luminescence units (RLU) in Hepa1-6 cells transfected with a plasmid expressing the luciferase gene under the control of the GPT promoter and incubated with various concentrations of nifuroxazide. . . . .                                                                                                                                                                                                                                                                                                                                                                                                                               | 7 |

|    |                                                                                                                                                                                                                    |   |
|----|--------------------------------------------------------------------------------------------------------------------------------------------------------------------------------------------------------------------|---|
| S8 | Relative luminescence units (RLU) in Huh7 cells transfected with a plasmid expressing the luciferase gene under the control of the GPT promoter and incubated with various concentrations of nifuroxazide. . . . . | 7 |
|----|--------------------------------------------------------------------------------------------------------------------------------------------------------------------------------------------------------------------|---|

## List of Tables

|    |                                                                                                                                                                                                                                                                                                                                                                                                                                                                                     |    |
|----|-------------------------------------------------------------------------------------------------------------------------------------------------------------------------------------------------------------------------------------------------------------------------------------------------------------------------------------------------------------------------------------------------------------------------------------------------------------------------------------|----|
| S1 | Drugs UP-regulating the GPT gene according to Gene2Drug. The database used was Reactome, using all the pathways that GPT is annotated to, i.e.: <i>positive regulation of transcription, DNA-dependent; embryonic placenta development; lysosome organization; positive regulation of autophagy; autophagy; humoral immune response.</i> . . . . .                                                                                                                                  | 8  |
| S2 | Drugs UP-regulating the GPT gene according to its fold-change as obtained through microarray analysis (Single Gene Expression method). For each drug, its rank according to how much GPT is UP-regulated is reported in the second column. Moreover, the rank of the gene in the profile of each drug is reported in column 2. Tomatidine, which was shown to be strongly effective (see Main Text), is ranked only 247 by the Single Gene Expression method. . . . .               | 8  |
| S3 | Drugs UP-regulating the TFEB gene according to Gene2Drug. The database used was GO-BP, using all the pathways that GPT is annotated to, i.e.: <i>metabolism of amino acids and derivatives; amino acid synthesis and interconversion transamination.</i> . . . . .                                                                                                                                                                                                                  | 15 |
| S4 | Drugs UP-regulating the TFEB gene according to its fold-change as obtained through microarray analysis (Single Gene Expression method). For each drug, its rank according to how much TFEB is UP-regulated is reported in the second column. Moreover, the rank of the gene in the profile of each drug is reported in column 2. Loperamide, which was shown to be effective at low concentration (see Main Text), is ranked only 242 by the Single Gene Expression method. . . . . | 15 |

# 1 Figures

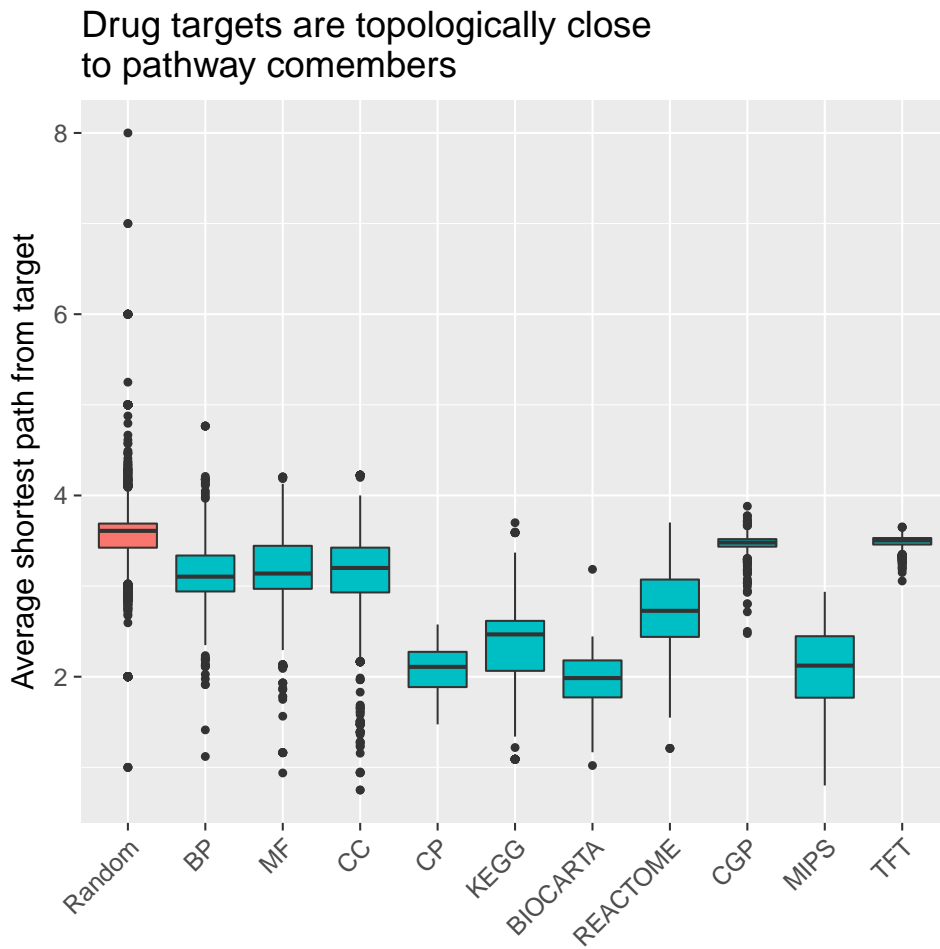

Fig. S1: Relation between PPI network-based and pathway based approaches. Given a therapeutic gene and the set of pathways it is annotated to according to the different databases, the other genes in the same pathways are topologically closer to it in the PPI network as compared to randomly chosen genes. The average shortest path from the selected gene to other pathway members is reported on the  $y$  axis for each database.

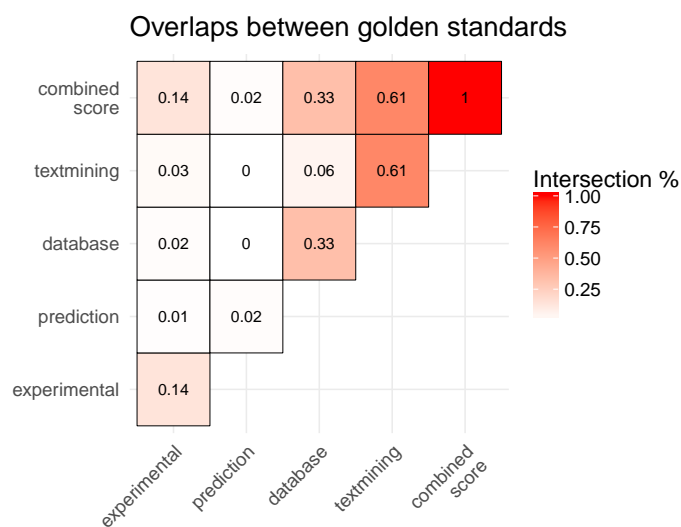

Fig. S2: Size of intersection between existent evidence scores in the STITCH database (subset matched against the Cmap database) as a percentage of the total number of evidences. Numbers on the diagonal represent how many times a drug-target evidence exists divided by the total number of reported pairs. A “combined score” always exist if one of the other evidences exist, thus “combined score” covers 100% of the pairs. Conversely, an “experimental” score is only present for 14% of the pairs. The “Text mining” evidence strongly drives the “combined score” covering 61% of all the known protein-target interactions in STITCH.

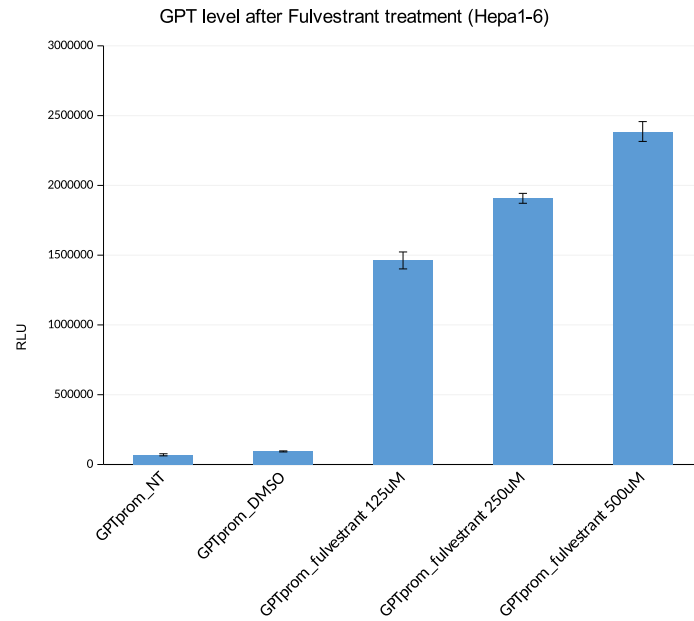

Fig. S3: Relative luminescence units (RLU) in Hepa1-6 cells transfected with a plasmid expressing the luciferase gene under the control of the GPT promoter and incubated with various concentrations of fulvestrant.

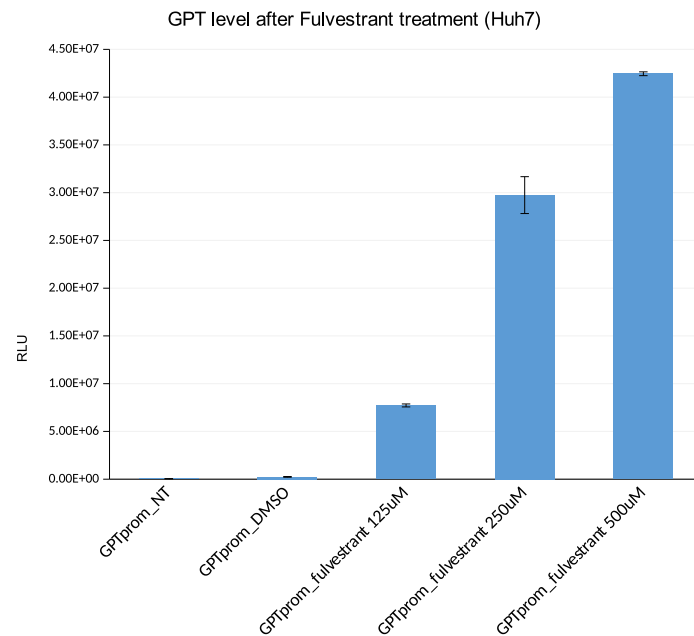

Fig. S4: Relative luminescence units (RLU) in Huh7 cells transfected with a plasmid expressing the luciferase gene under the control of the GPT promoter and incubated with various concentrations of fulvestrant.

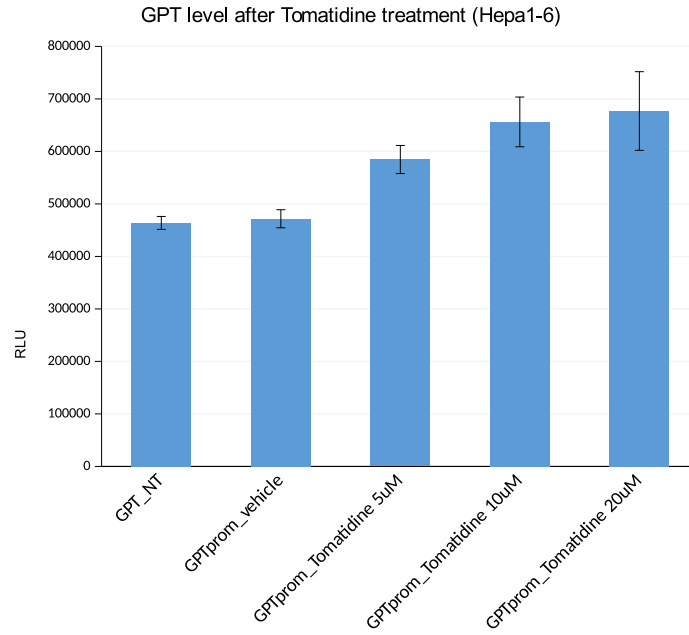

Fig. S5: Relative luminescence units (RLU) in Hepa1-6 cells transfected with a plasmid expressing the luciferase gene under the control of the GPT promoter and incubated with various concentrations of tomatidine.

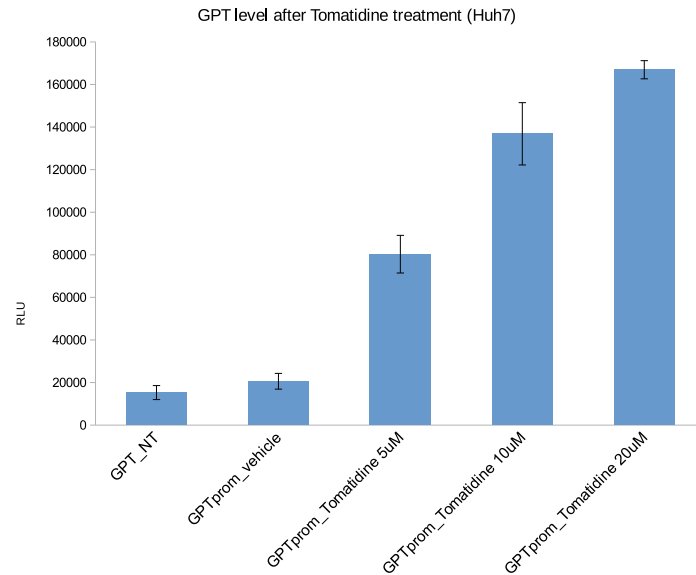

Fig. S6: Relative luminescence units (RLU) in Huh7 cells transfected with a plasmid expressing the luciferase gene under the control of the GPT promoter and incubated with various concentrations of tomatidine.

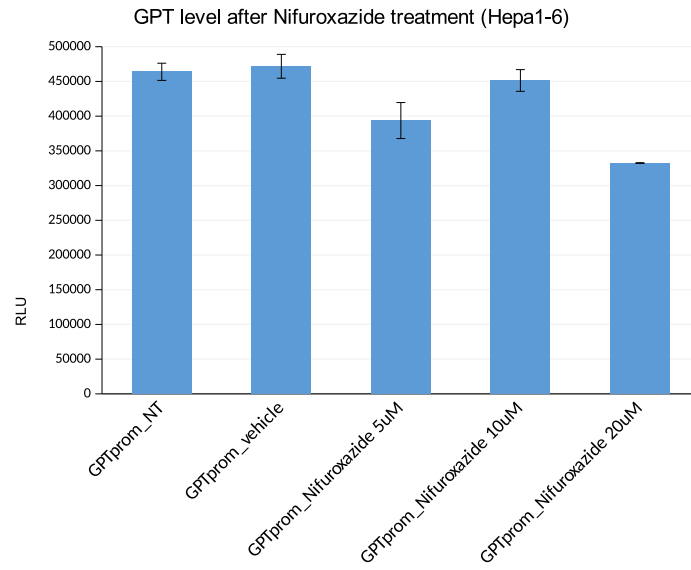

Fig. S7: Relative luminescence units (RLU) in Hepa1-6 cells transfected with a plasmid expressing the luciferase gene under the control of the GPT promoter and incubated with various concentrations of nifuroxazide.

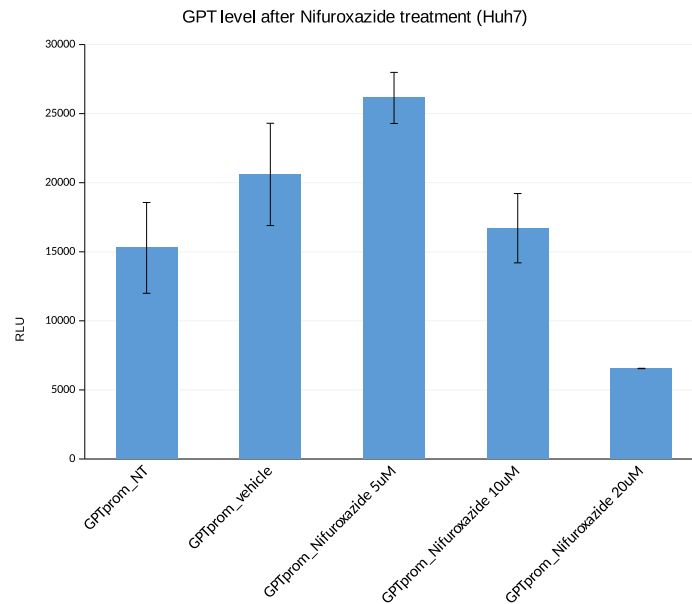

Fig. S8: Relative luminescence units (RLU) in Huh7 cells transfected with a plasmid expressing the luciferase gene under the control of the GPT promoter and incubated with various concentrations of nifuroxazide.

## 2 Tables

Tab. S1: Drugs UP-regulating the GPT gene according to Gene2Drug. The database used was Reactome, using all the pathways that GPT is annotated to, i.e.: *positive regulation of transcription, DNA-dependent; embryonic placenta development; lysosome organization; positive regulation of autophagy; autophagy; humoral immune response.*

| Drug                              | Rank | ES    | p     |
|-----------------------------------|------|-------|-------|
| fulvestrant                       | 1    | 0.979 | 0.001 |
| tomatidine                        | 2    | 0.972 | 0.002 |
| nifuroxazide                      | 3    | 0.967 | 0.002 |
| terguride                         | 4    | 0.963 | 0.003 |
| monastrol                         | 5    | 0.958 | 0.004 |
| triflusal                         | 6    | 0.957 | 0.004 |
| 5707885                           | 7    | 0.955 | 0.004 |
| enilconazole                      | 8    | 0.954 | 0.005 |
| 5666823                           | 9    | 0.951 | 0.005 |
| SC-19220                          | 10   | 0.949 | 0.006 |
| mycophenolic_acid                 | 11   | 0.949 | 0.006 |
| ciclosporin                       | 12   | 0.948 | 0.006 |
| cefotiam                          | 13   | 0.945 | 0.007 |
| erastin                           | 14   | 0.945 | 0.007 |
| epitiostanol                      | 15   | 0.940 | 0.008 |
| benperidol                        | 16   | 0.937 | 0.008 |
| cefapirin                         | 17   | 0.933 | 0.010 |
| betulinic_acid                    | 18   | 0.931 | 0.010 |
| nitrofurafal                      | 19   | 0.931 | 0.010 |
| phenoxybenzamine                  | 20   | 0.931 | 0.010 |
| apomorphine                       | 21   | 0.925 | 0.012 |
| riluzole                          | 22   | 0.922 | 0.013 |
| vanoxerine                        | 23   | 0.919 | 0.014 |
| oxybenzone                        | 24   | 0.918 | 0.014 |
| fasudil                           | 25   | 0.913 | 0.016 |
| 16-phenyltetranorprostaglandin_E2 | 26   | 0.910 | 0.017 |
| oxybuprocaine                     | 27   | 0.909 | 0.017 |
| spaglumatic_acid                  | 28   | 0.909 | 0.017 |
| AG-013608                         | 29   | 0.907 | 0.018 |
| glycopyrronium_bromide            | 30   | 0.907 | 0.018 |

Tab. S2: Drugs UP-regulating the GPT gene according to its fold-change as obtained through microarray analysis (Single Gene Expression method). For each drug, its rank according to how much GPT is UP-regulated is reported in the second column. Moreover, the rank of the gene in the profile of each drug is reported in column 2. Tomatidine, which was shown to be strongly effective (see Main Text), is ranked only 247 by the Single Gene Expression method.

| Drug           | Drug Rank for GPT | GPT Rank for Drug |
|----------------|-------------------|-------------------|
| PF-00562151-00 | 1                 | 273               |
| hydroxyzine    | 2                 | 323               |
| amiloride      | 3                 | 378               |



|                          |    |     |
|--------------------------|----|-----|
| piperine                 | 4  | 384 |
| theophylline             | 5  | 407 |
| chlorphenesin            | 6  | 416 |
| etidronic_acid           | 7  | 468 |
| ambroxol                 | 8  | 483 |
| ginkgolide_A             | 9  | 518 |
| debrisoquine             | 10 | 529 |
| tolazoline               | 11 | 532 |
| ascorbic_acid            | 12 | 554 |
| lumicolchicine           | 13 | 562 |
| metanephrine             | 14 | 570 |
| cefotiam                 | 15 | 578 |
| oxetacaine               | 16 | 594 |
| conessine                | 17 | 605 |
| serotonin                | 18 | 608 |
| fenoprofen               | 19 | 622 |
| delsoline                | 20 | 632 |
| colforsin                | 21 | 639 |
| quinethazone             | 22 | 652 |
| colecalfiferol           | 23 | 653 |
| tiabendazole             | 24 | 658 |
| betamethasone            | 25 | 670 |
| orlistat                 | 26 | 674 |
| tetracaine               | 27 | 679 |
| ergocalciferol           | 28 | 695 |
| prochlorperazine         | 29 | 714 |
| terconazole              | 30 | 716 |
| oxybuprocaine            | 31 | 721 |
| PF-00539758-00           | 32 | 726 |
| chlortetracycline        | 33 | 730 |
| metixene                 | 34 | 735 |
| acetazolamide            | 35 | 736 |
| probenecid               | 36 | 748 |
| rifampicin               | 37 | 753 |
| ioxaglic_acid            | 38 | 757 |
| zoxazolamine             | 39 | 763 |
| metrizamide              | 40 | 765 |
| zidovudine               | 41 | 769 |
| fludroxycortide          | 42 | 788 |
| methapyrilene            | 43 | 801 |
| N-acetyl-L-aspartic_acid | 44 | 815 |
| ciclosporin              | 45 | 829 |
| chloropyrazine           | 46 | 830 |
| iopromide                | 47 | 838 |
| Prestwick-1084           | 48 | 853 |
| ciprofloxacin            | 49 | 868 |
| dihydrostreptomycin      | 50 | 868 |
| nafcillin                | 51 | 882 |
| cefotetan                | 52 | 904 |

|                             |     |      |
|-----------------------------|-----|------|
| flufenamic_acid             | 53  | 912  |
| tretinoin                   | 54  | 923  |
| tetracycline                | 55  | 924  |
| cyclobenzaprine             | 56  | 929  |
| risperidone                 | 57  | 961  |
| ciprofibrate                | 58  | 977  |
| budesonide                  | 59  | 989  |
| ethaverine                  | 60  | 992  |
| fursultiamine               | 61  | 994  |
| isoxsuprine                 | 62  | 994  |
| trimetazidine               | 63  | 994  |
| etomidate                   | 64  | 1004 |
| indoprofen                  | 65  | 1014 |
| clidinium_bromide           | 66  | 1028 |
| rolitetracycline            | 67  | 1033 |
| xamoterol                   | 68  | 1050 |
| acetylsalicylsalicylic_acid | 69  | 1065 |
| quercetin                   | 70  | 1072 |
| colchicine                  | 71  | 1074 |
| cefixime                    | 72  | 1077 |
| alpha-yohimbine             | 73  | 1081 |
| sertaconazole               | 74  | 1089 |
| monastrol                   | 75  | 1096 |
| bromopride                  | 76  | 1110 |
| securinine                  | 77  | 1116 |
| pyrazinamide                | 78  | 1121 |
| raloxifene                  | 79  | 1137 |
| sulmazole                   | 80  | 1147 |
| calcium_pantothenate        | 81  | 1148 |
| neostigmine_bromide         | 82  | 1148 |
| buspirone                   | 83  | 1155 |
| karakoline                  | 84  | 1163 |
| Prestwick-675               | 85  | 1171 |
| hydrocotarnine              | 86  | 1177 |
| primidone                   | 87  | 1187 |
| lactobionic_acid            | 88  | 1188 |
| STOCK1N-35215               | 89  | 1233 |
| sulconazole                 | 90  | 1233 |
| (-)-atenolol                | 91  | 1236 |
| clofilium_tosylate          | 92  | 1248 |
| azlocillin                  | 93  | 1250 |
| ethambutol                  | 94  | 1252 |
| mephenytoin                 | 95  | 1269 |
| thiamine                    | 96  | 1271 |
| nilutamide                  | 97  | 1285 |
| proadifen                   | 98  | 1304 |
| moxonidine                  | 99  | 1313 |
| sulfaquinoxaline            | 100 | 1313 |
| naringenin                  | 101 | 1315 |

|                       |     |      |
|-----------------------|-----|------|
| colistin              | 102 | 1316 |
| promethazine          | 103 | 1324 |
| exemestane            | 104 | 1326 |
| mepacrine             | 105 | 1329 |
| carisoprodol          | 106 | 1335 |
| tolazamide            | 107 | 1345 |
| iobenguane            | 108 | 1359 |
| trapidil              | 109 | 1360 |
| carbarsone            | 110 | 1364 |
| danazol               | 111 | 1364 |
| tolmetin              | 112 | 1392 |
| palmatine             | 113 | 1397 |
| clioquinol            | 114 | 1400 |
| altretamine           | 115 | 1409 |
| procyclidine          | 116 | 1416 |
| mesalazine            | 117 | 1421 |
| bretylum_tosilate     | 118 | 1425 |
| sparteine             | 119 | 1431 |
| methazolamide         | 120 | 1439 |
| orciprenaline         | 121 | 1455 |
| xylazine              | 122 | 1468 |
| epiandrosterone       | 123 | 1471 |
| benzonatate           | 124 | 1492 |
| vitexin               | 125 | 1493 |
| etilefrine            | 126 | 1496 |
| piperidolate          | 127 | 1508 |
| myricetin             | 128 | 1511 |
| fasudil               | 129 | 1526 |
| diphenhydramine       | 130 | 1541 |
| piracetam             | 131 | 1543 |
| pentolonium           | 132 | 1546 |
| 3-nitropropionic_acid | 133 | 1553 |
| hexetidine            | 134 | 1553 |
| probucol              | 135 | 1559 |
| rotenone              | 136 | 1566 |
| Prestwick-559         | 137 | 1592 |
| trimipramine          | 138 | 1597 |
| propranolol           | 139 | 1601 |
| octopamine            | 140 | 1603 |
| ciclacillin           | 141 | 1606 |
| apigenin              | 142 | 1615 |
| alprenolol            | 143 | 1632 |
| pyrantel              | 144 | 1632 |
| brinzolamide          | 145 | 1635 |
| lovastatin            | 146 | 1637 |
| zalcitabine           | 147 | 1637 |
| eldeline              | 148 | 1640 |
| aminophenazone        | 149 | 1648 |
| saquinavir            | 150 | 1656 |

|                             |     |      |
|-----------------------------|-----|------|
| clopamide                   | 151 | 1658 |
| ondansetron                 | 152 | 1663 |
| corbadrine                  | 153 | 1665 |
| 0225151-0000                | 154 | 1668 |
| Prestwick-1103              | 155 | 1669 |
| cefoxitin                   | 156 | 1674 |
| salsolinol                  | 157 | 1692 |
| spironolactone              | 158 | 1693 |
| bufloxedil                  | 159 | 1704 |
| sulfadoxine                 | 160 | 1707 |
| tonzonium_bromide           | 161 | 1722 |
| procaine                    | 162 | 1753 |
| iopanoic_acid               | 163 | 1756 |
| dipivefrine                 | 164 | 1760 |
| R-atenolol                  | 165 | 1765 |
| puromycin                   | 166 | 1776 |
| rottlerin                   | 167 | 1781 |
| dipyridamole                | 168 | 1782 |
| raubasine                   | 169 | 1783 |
| sulfachlorpyridazine        | 170 | 1784 |
| mefloquine                  | 171 | 1791 |
| metronidazole               | 172 | 1793 |
| tacrine                     | 173 | 1794 |
| bromperidol                 | 174 | 1811 |
| dexibuprofen                | 175 | 1811 |
| piperlongumine              | 176 | 1816 |
| gemfibrozil                 | 177 | 1823 |
| scoulerine                  | 178 | 1826 |
| piromidic_acid              | 179 | 1836 |
| melatonin                   | 180 | 1839 |
| tobramycin                  | 181 | 1860 |
| 7-aminocephalosporanic_acid | 182 | 1870 |
| MG-262                      | 183 | 1870 |
| alcuronium_chloride         | 184 | 1875 |
| oxolamine                   | 185 | 1877 |
| molindone                   | 186 | 1880 |
| chloramphenicol             | 187 | 1897 |
| brompheniramine             | 188 | 1916 |
| cytochalasin_B              | 189 | 1933 |
| flavoxate                   | 190 | 1938 |
| amantadine                  | 191 | 1949 |
| metampicillin               | 192 | 1958 |
| ciclopirox                  | 193 | 1959 |
| gliquidone                  | 194 | 1962 |
| quinidine                   | 195 | 1968 |
| molsidomine                 | 196 | 1969 |
| reserpine                   | 197 | 1975 |
| meclozine                   | 198 | 1981 |
| norcyclobenzaprine          | 199 | 1984 |

|                          |     |      |
|--------------------------|-----|------|
| cefamandole              | 200 | 2007 |
| apramycin                | 201 | 2009 |
| diclofenamide            | 202 | 2009 |
| pronetalol               | 203 | 2013 |
| 6-azathymine             | 204 | 2019 |
| cefotaxime               | 205 | 2020 |
| (+/-)-catechin           | 206 | 2022 |
| 10-methoxyharmalan       | 207 | 2022 |
| lasalocid                | 208 | 2054 |
| gramine                  | 209 | 2057 |
| esculetin                | 210 | 2061 |
| vinpocetine              | 211 | 2064 |
| santonin                 | 212 | 2092 |
| benzthiazide             | 213 | 2100 |
| bacampicillin            | 214 | 2101 |
| imidurea                 | 215 | 2118 |
| hydrastine_hydrochloride | 216 | 2133 |
| liothyronine             | 217 | 2133 |
| dioxybenzone             | 218 | 2147 |
| mephentermine            | 219 | 2154 |
| amiodarone               | 220 | 2174 |
| nomifensine              | 221 | 2177 |
| resveratrol              | 222 | 2177 |
| ofloxacin                | 223 | 2188 |
| etynodiol                | 224 | 2203 |
| riluzole                 | 225 | 2203 |
| piperacetazine           | 226 | 2209 |
| leflunomide              | 227 | 2221 |
| lanatoside_C             | 228 | 2224 |
| oxybutynin               | 229 | 2229 |
| 12,13-EODE               | 230 | 2245 |
| PF-00539745-00           | 231 | 2276 |
| azacitidine              | 232 | 2278 |
| myosmine                 | 233 | 2279 |
| gentamicin               | 234 | 2280 |
| spiperone                | 235 | 2285 |
| bendroflumethiazide      | 236 | 2299 |
| clindamycin              | 237 | 2336 |
| prazosin                 | 238 | 2346 |
| meropenem                | 239 | 2355 |
| trimethoprim             | 240 | 2360 |
| butirosin                | 241 | 2367 |
| depudecin                | 242 | 2373 |
| DL-thiorphan             | 243 | 2378 |
| crotamiton               | 244 | 2379 |
| tolfenamic_acid          | 245 | 2380 |
| sulfamonomethoxine       | 246 | 2387 |
| tomatidine               | 247 | 2391 |
| alexidine                | 248 | 2396 |

|                             |     |      |
|-----------------------------|-----|------|
| Prestwick-860               | 249 | 2398 |
| fenbendazole                | 250 | 2400 |
| tracazolate                 | 251 | 2407 |
| drofenine                   | 252 | 2411 |
| metaraminol                 | 253 | 2416 |
| fluoxetine                  | 254 | 2417 |
| yohimbic_acid               | 255 | 2457 |
| trimethylcolchicinic_acid   | 256 | 2459 |
| desipramine                 | 257 | 2463 |
| cycloserine                 | 258 | 2473 |
| canadine                    | 259 | 2483 |
| pentetic_acid               | 260 | 2483 |
| dantrolene                  | 261 | 2494 |
| tyrphostin_AG-1478          | 262 | 2502 |
| phenoxybenzamine            | 263 | 2509 |
| paclitaxel                  | 264 | 2528 |
| IC-86621                    | 265 | 2529 |
| morantel                    | 266 | 2537 |
| Trolox_C                    | 267 | 2540 |
| levodopa                    | 268 | 2548 |
| tetroquinone                | 269 | 2550 |
| memantine                   | 270 | 2566 |
| desoxycortone               | 271 | 2567 |
| levobunolol                 | 272 | 2580 |
| doxylamine                  | 273 | 2597 |
| DL-PPMP                     | 274 | 2620 |
| azaperone                   | 275 | 2624 |
| hexamethonium_bromide       | 276 | 2624 |
| iloprost                    | 277 | 2629 |
| urapidil                    | 278 | 2644 |
| diltiazem                   | 279 | 2651 |
| alprostadil                 | 280 | 2663 |
| alsterpaullone              | 281 | 2675 |
| retrorsine                  | 282 | 2684 |
| fosfosal                    | 283 | 2686 |
| thioguanosine               | 284 | 2693 |
| naltrexone                  | 285 | 2702 |
| torasemide                  | 286 | 2703 |
| bephenium_hydroxynaphthoate | 287 | 2706 |
| nicardipine                 | 288 | 2707 |
| ganciclovir                 | 289 | 2709 |
| digitoxigenin               | 290 | 2710 |
| dexpanthenol                | 291 | 2717 |
| amphotericin_B              | 292 | 2736 |
| oxprenolol                  | 293 | 2742 |
| sulfametoxydiazine          | 294 | 2743 |
| Prestwick-983               | 295 | 2744 |
| nicergoline                 | 296 | 2752 |
| alvespimycin                | 297 | 2776 |

|                  |     |      |
|------------------|-----|------|
| sulfadimethoxine | 298 | 2790 |
| novobiocin       | 299 | 2813 |
| nadolol          | 300 | 2817 |

Tab. S3: Drugs UP-regulating the TFEB gene according to Gene2Drug. The database used was GO-BP, using all the pathways that GPT is annotated to, i.e.: *metabolism of amino acids and derivatives; amino acid synthesis and interconversion transamination*.

| Drug                           | Rank | ES    | p     |
|--------------------------------|------|-------|-------|
| pimozide                       | 1    | 0.792 | 0.001 |
| depropine                      | 2    | 0.780 | 0.001 |
| maprotiline                    | 3    | 0.765 | 0.002 |
| nifurtimox                     | 4    | 0.752 | 0.002 |
| benzethonium_chloride          | 5    | 0.747 | 0.003 |
| alprenolol                     | 6    | 0.746 | 0.003 |
| 0297417-0002B                  | 7    | 0.744 | 0.003 |
| miconazole                     | 8    | 0.743 | 0.003 |
| loperamide                     | 9    | 0.732 | 0.003 |
| etoposide                      | 10   | 0.729 | 0.003 |
| cytochalasin_B                 | 11   | 0.713 | 0.005 |
| astemizole                     | 12   | 0.712 | 0.005 |
| valinomycin                    | 13   | 0.712 | 0.005 |
| oxyphenbutazone                | 14   | 0.710 | 0.005 |
| methylbenzethonium_chloride    | 15   | 0.706 | 0.005 |
| emetine                        | 16   | 0.696 | 0.006 |
| pyrvinium                      | 17   | 0.696 | 0.006 |
| oligomycin                     | 18   | 0.695 | 0.006 |
| oxybuprocaine                  | 19   | 0.694 | 0.006 |
| homochlorcyclizine             | 20   | 0.692 | 0.006 |
| cyclic_adenosine_monophosphate | 21   | 0.688 | 0.007 |
| fenoterol                      | 22   | 0.675 | 0.009 |
| proadifen                      | 23   | 0.671 | 0.009 |
| rottlerin                      | 24   | 0.670 | 0.009 |
| pimethixene                    | 25   | 0.663 | 0.010 |
| tamoxifen                      | 26   | 0.657 | 0.011 |
| protriptyline                  | 27   | 0.656 | 0.012 |
| clonidine                      | 28   | 0.653 | 0.012 |
| carbenoxolone                  | 29   | 0.651 | 0.012 |
| quinostatin                    | 30   | 0.650 | 0.013 |

Tab. S4: Drugs UP-regulating the TFEB gene according to its fold-change as obtained through microarray analysis (Single Gene Expression method). For each drug, its rank according to how much TFEB is UP-regulated is reported in the second column. Moreover, the rank of the gene in the profile of each drug is reported in column 2. Loperamide, which was shown to be effective at low concentration (see Main Text), is ranked only 242 by the Single Gene Expression method.

| Drug        | Drug rank for TFEB | TFEB rank for drug |
|-------------|--------------------|--------------------|
| foliosidine | 1                  | 344                |

|                      |    |     |
|----------------------|----|-----|
| azathioprine         | 2  | 410 |
| trimetazidine        | 3  | 427 |
| calcium_pantothenate | 4  | 450 |
| nomifensine          | 5  | 456 |
| fenspiride           | 6  | 464 |
| diazoxide            | 7  | 468 |
| naringin             | 8  | 490 |
| cefadroxil           | 9  | 491 |
| ivermectin           | 10 | 513 |
| pioglitazone         | 11 | 591 |
| acenocoumarol        | 12 | 604 |
| natamycin            | 13 | 611 |
| hemicholinium        | 14 | 618 |
| mefloquine           | 15 | 627 |
| butacaine            | 16 | 651 |
| hydralazine          | 17 | 652 |
| hycanthone           | 18 | 686 |
| minaprine            | 19 | 699 |
| ramifenazone         | 20 | 721 |
| (-)-atenolol         | 21 | 733 |
| apomorphine          | 22 | 734 |
| ketoprofen           | 23 | 734 |
| nicergoline          | 24 | 738 |
| tamoxifen            | 25 | 740 |
| guanethidine         | 26 | 746 |
| meptazinol           | 27 | 753 |
| CP-863187            | 28 | 757 |
| fursultiamine        | 29 | 762 |
| flupentixol          | 30 | 788 |
| terfenadine          | 31 | 791 |
| lidoflazine          | 32 | 803 |
| riluzole             | 33 | 822 |
| valproic_acid        | 34 | 828 |
| dosulepin            | 35 | 832 |
| etiocholanolone      | 36 | 835 |
| carbinoxamine        | 37 | 838 |
| etodolac             | 38 | 842 |
| ginkgolide_A         | 39 | 842 |
| pyrithyldione        | 40 | 853 |
| bisoprolol           | 41 | 856 |
| bacampicillin        | 42 | 874 |
| streptozocin         | 43 | 877 |
| repaglinide          | 44 | 886 |
| chlorprothixene      | 45 | 918 |
| edrophonium_chloride | 46 | 922 |
| cinnarizine          | 47 | 930 |
| myricetin            | 48 | 940 |
| practolol            | 49 | 943 |
| thiopropazine        | 50 | 955 |



|                         |    |      |
|-------------------------|----|------|
| dihydrostreptomycin     | 51 | 983  |
| pepstatin               | 52 | 987  |
| oxybuprocaine           | 53 | 998  |
| harmine                 | 54 | 1011 |
| tocainide               | 55 | 1043 |
| ketotifen               | 56 | 1052 |
| Chicago_Sky_Blue_6B     | 57 | 1053 |
| ascorbic_acid           | 58 | 1059 |
| nifurtimox              | 59 | 1059 |
| aztreonam               | 60 | 1063 |
| dizocilpine             | 61 | 1075 |
| debrisoquine            | 62 | 1081 |
| tetrahydroalstonine     | 63 | 1081 |
| pentolonium             | 64 | 1084 |
| benzbromarone           | 65 | 1096 |
| trifluridine            | 66 | 1098 |
| bupivacaine             | 67 | 1105 |
| BCB000040               | 68 | 1113 |
| tranlycypromine         | 69 | 1121 |
| cyanocobalamin          | 70 | 1127 |
| mepyramine              | 71 | 1127 |
| tolazoline              | 72 | 1135 |
| alfuzosin               | 73 | 1147 |
| molindone               | 74 | 1148 |
| probucol                | 75 | 1151 |
| lisuride                | 76 | 1155 |
| pempidine               | 77 | 1159 |
| neomycin                | 78 | 1163 |
| testosterone            | 79 | 1165 |
| BCB000039               | 80 | 1167 |
| cefalexin               | 81 | 1167 |
| sulfacetamide           | 82 | 1177 |
| picotamide              | 83 | 1181 |
| aminophylline           | 84 | 1195 |
| pimethixene             | 85 | 1205 |
| hydrochlorothiazide     | 86 | 1227 |
| lynestrenol             | 87 | 1240 |
| prasterone              | 88 | 1253 |
| proadifen               | 89 | 1270 |
| prednisone              | 90 | 1271 |
| chlorambucil            | 91 | 1305 |
| chloroquine             | 92 | 1313 |
| desipramine             | 93 | 1321 |
| econazole               | 94 | 1360 |
| mebendazole             | 95 | 1363 |
| rolitetracycline        | 96 | 1364 |
| ursolic_acid            | 97 | 1377 |
| sulfamethoxy pyridazine | 98 | 1399 |
| miconazole              | 99 | 1400 |

|                       |     |      |
|-----------------------|-----|------|
| PF-00875133-00        | 100 | 1406 |
| lomustine             | 101 | 1407 |
| fluvastatin           | 102 | 1419 |
| sulfaguanidine        | 103 | 1434 |
| clorgiline            | 104 | 1450 |
| metanephrine          | 105 | 1455 |
| tolfenamic_acid       | 106 | 1456 |
| nalbuphine            | 107 | 1466 |
| serotonin             | 108 | 1476 |
| colecalfiferol        | 109 | 1485 |
| chlorphenamine        | 110 | 1492 |
| trimethobenzamide     | 111 | 1493 |
| cefixime              | 112 | 1497 |
| coralyne              | 113 | 1526 |
| daunorubicin          | 114 | 1562 |
| diloxanide            | 115 | 1571 |
| thioperamide          | 116 | 1572 |
| flucytosine           | 117 | 1577 |
| mimosine              | 118 | 1581 |
| retrorsine            | 119 | 1594 |
| chlorogenic_acid      | 120 | 1596 |
| napelline             | 121 | 1611 |
| guanadrel             | 122 | 1646 |
| prednisolone          | 123 | 1649 |
| dydrogesterone        | 124 | 1650 |
| piretanide            | 125 | 1660 |
| ranitidine            | 126 | 1661 |
| amitriptyline         | 127 | 1664 |
| ciclosporin           | 128 | 1677 |
| scoulerine            | 129 | 1677 |
| tremorine             | 130 | 1680 |
| cyclopentiazide       | 131 | 1681 |
| piracetam             | 132 | 1690 |
| withaferin_A          | 133 | 1707 |
| piperine              | 134 | 1713 |
| propantheline_bromide | 135 | 1716 |
| stachydrine           | 136 | 1729 |
| harmaline             | 137 | 1745 |
| perhexiline           | 138 | 1746 |
| labetalol             | 139 | 1750 |
| PF-01378883-00        | 140 | 1753 |
| hexamethonium_bromide | 141 | 1755 |
| naftifine             | 142 | 1788 |
| lactobionic_acid      | 143 | 1806 |
| doxycycline           | 144 | 1814 |
| amylocaine            | 145 | 1822 |
| naftopidil            | 146 | 1825 |
| oleandomycin          | 147 | 1834 |
| 6-benzylaminopurine   | 148 | 1838 |

|                           |     |      |
|---------------------------|-----|------|
| azaperone                 | 149 | 1839 |
| probenecid                | 150 | 1843 |
| 5155877                   | 151 | 1850 |
| vinblastine               | 152 | 1852 |
| dapsone                   | 153 | 1856 |
| mecamylamine              | 154 | 1856 |
| acebutolol                | 155 | 1865 |
| dipivefrine               | 156 | 1874 |
| aminoglutethimide         | 157 | 1888 |
| bambuterol                | 158 | 1895 |
| primidone                 | 159 | 1895 |
| bromopride                | 160 | 1900 |
| dyclonine                 | 161 | 1933 |
| mepacrine                 | 162 | 1935 |
| 5248896                   | 163 | 1936 |
| propoxycaine              | 164 | 1965 |
| meclofenoxate             | 165 | 1986 |
| pyrimethamine             | 166 | 1986 |
| torasemide                | 167 | 1991 |
| phenindione               | 168 | 1998 |
| scriptaid                 | 169 | 2002 |
| amprolium                 | 170 | 2006 |
| emetine                   | 171 | 2017 |
| brompheniramine           | 172 | 2018 |
| carteolol                 | 173 | 2026 |
| isotretinoin              | 174 | 2026 |
| fusaric_acid              | 175 | 2033 |
| salsolinol                | 176 | 2036 |
| celastrol                 | 177 | 2041 |
| cloxacillin               | 178 | 2043 |
| mevalolactone             | 179 | 2059 |
| rifabutin                 | 180 | 2061 |
| nifenazone                | 181 | 2063 |
| Prestwick-559             | 182 | 2070 |
| 6-bromoindirubin-3'-oxime | 183 | 2071 |
| rilmenidine               | 184 | 2075 |
| flufenamic_acid           | 185 | 2083 |
| tranexamic_acid           | 186 | 2083 |
| tretinoin                 | 187 | 2093 |
| benzamil                  | 188 | 2102 |
| Prestwick-1103            | 189 | 2105 |
| ioxaglic_acid             | 190 | 2107 |
| bufexamac                 | 191 | 2110 |
| chenodeoxycholic_acid     | 192 | 2115 |
| propidium_iodide          | 193 | 2119 |
| isoconazole               | 194 | 2127 |
| pridinol                  | 195 | 2132 |
| flunixin                  | 196 | 2135 |
| phenoxybenzamine          | 197 | 2136 |

|                     |     |      |
|---------------------|-----|------|
| caffeic_acid        | 198 | 2145 |
| astemizole          | 199 | 2150 |
| lorglumide          | 200 | 2151 |
| pheniramine         | 201 | 2152 |
| tacrine             | 202 | 2164 |
| dimethadione        | 203 | 2171 |
| Prestwick-967       | 204 | 2174 |
| flumetasone         | 205 | 2200 |
| norethisterone      | 206 | 2200 |
| alprenolol          | 207 | 2201 |
| cefazolin           | 208 | 2210 |
| carcinine           | 209 | 2213 |
| aminophenazone      | 210 | 2223 |
| ceforanide          | 211 | 2224 |
| atovaquone          | 212 | 2233 |
| diclofenamide       | 213 | 2255 |
| isoetarine          | 214 | 2257 |
| 5152487             | 215 | 2261 |
| dl-alpha_tocopherol | 216 | 2273 |
| mesalazine          | 217 | 2276 |
| chlortetracycline   | 218 | 2301 |
| phenacetin          | 219 | 2313 |
| ethambutol          | 220 | 2319 |
| nocodazole          | 221 | 2329 |
| phenformin          | 222 | 2355 |
| sertaconazole       | 223 | 2362 |
| sulfamethoxazole    | 224 | 2366 |
| homochlorcyclizine  | 225 | 2380 |
| triamcinolone       | 226 | 2386 |
| N6-methyladenosine  | 227 | 2392 |
| cefoxitin           | 228 | 2406 |
| zuclopenthixol      | 229 | 2416 |
| Prestwick-682       | 230 | 2418 |
| thioguanosine       | 231 | 2428 |
| sulfinpyrazone      | 232 | 2437 |
| dihydroergotamine   | 233 | 2452 |
| cyclizine           | 234 | 2466 |
| protoveratrine_A    | 235 | 2482 |
| (+)-chelidonine     | 236 | 2497 |
| simvastatin         | 237 | 2498 |
| carmustine          | 238 | 2524 |
| corbadrine          | 239 | 2524 |
| finasteride         | 240 | 2528 |
| loperamide          | 241 | 2528 |
| hesperetin          | 242 | 2538 |
| vinpocetine         | 243 | 2541 |
| amantadine          | 244 | 2549 |
| imipenem            | 245 | 2552 |
| 3-acetylcoumarin    | 246 | 2553 |

|                           |     |      |
|---------------------------|-----|------|
| hydroxyzine               | 247 | 2558 |
| cephaeline                | 248 | 2563 |
| xamoterol                 | 249 | 2588 |
| rolipram                  | 250 | 2597 |
| bupirone                  | 251 | 2601 |
| Prestwick-984             | 252 | 2614 |
| monobenzene               | 253 | 2616 |
| troglitazone              | 254 | 2617 |
| diclofenac                | 255 | 2624 |
| glycopyrronium_bromide    | 256 | 2633 |
| nabumetone                | 257 | 2639 |
| timolol                   | 258 | 2646 |
| fendiline                 | 259 | 2660 |
| 2-aminobenzenesulfonamide | 260 | 2662 |
| kawain                    | 261 | 2664 |
| nadolol                   | 262 | 2667 |
| epivincamine              | 263 | 2670 |
| dexverapamil              | 264 | 2671 |
| doxazosin                 | 265 | 2684 |
| SB-203580                 | 266 | 2709 |
| bergenin                  | 267 | 2712 |
| PNU-0230031               | 268 | 2714 |
| niridazole                | 269 | 2724 |
| pirenzepine               | 270 | 2746 |
| sulfametoxydiazine        | 271 | 2752 |
| lysergol                  | 272 | 2761 |
| chlorcyclizine            | 273 | 2785 |
| 5194442                   | 274 | 2788 |
| aciclovir                 | 275 | 2798 |
| cotinine                  | 276 | 2808 |
| picrotoxinin              | 277 | 2808 |
| HC_toxin                  | 278 | 2829 |
| xylometazoline            | 279 | 2838 |
| AG-012559                 | 280 | 2840 |
| 5224221                   | 281 | 2851 |
| loxapine                  | 282 | 2883 |
| sulconazole               | 283 | 2894 |
| thapsigargin              | 284 | 2895 |
| 4,5-dianilinophthalimide  | 285 | 2920 |
| MS-275                    | 286 | 2927 |
| meteneprost               | 287 | 2936 |
| cefotiam                  | 288 | 2941 |
| oxybutynin                | 289 | 2949 |
| disulfiram                | 290 | 2952 |
| flucloxacillin            | 291 | 2961 |
| procaine                  | 292 | 2966 |
| bretylum_tosilate         | 293 | 2979 |
| erastin                   | 294 | 2979 |
| methylprednisolone        | 295 | 2982 |

|                       |     |      |
|-----------------------|-----|------|
| carbamazepine         | 296 | 2991 |
| decamethonium_bromide | 297 | 3004 |
| celecoxib             | 298 | 3010 |
| primaquine            | 299 | 3034 |
| NS-398                | 300 | 3036 |
